# Supplementary material for: The disease burden of human cystic echinococcosis based on HDRs from 2001 to 2014 in Italy
Source: PubMed Central journal article supplement (PMC5546721; doi:10.1371/journal.pntd.0005771), 2017-07-26
Supplement: pntd.0005771.s001.pdf [file pntd.0005771.s001.pdf]

| Field Name        | Variable Name                          | Various                                                                                                                                                                                                                                                                                                                                                                                                       |
|-------------------|----------------------------------------|---------------------------------------------------------------------------------------------------------------------------------------------------------------------------------------------------------------------------------------------------------------------------------------------------------------------------------------------------------------------------------------------------------------|
| <b>cod_reg</b>    | Hospitalization regional code          | "010" = Piemonte; "020" = Val d'Aosta; "030" = Lombardia; "041" = P.A. di Bolzano; "042" = P.A. di Trento; "050" = Veneto; "060" = Friuli Venezia Giulia; "070" = Liguria; "080" = Emilia Romagna; "090" = Toscana; "100" = Umbria; "110" = Marche; "120" = Lazio; "130" = Abruzzo; "140" = Molise; "150" = Campania; "160" = Puglia; "170" = Basilicata; "180" = Calabria; "190" = Sicilia; "200" = Sardegna |
| <b>prov_res</b>   | residence province code                | ISTAT Codes                                                                                                                                                                                                                                                                                                                                                                                                   |
| <b>com_res</b>    | residence municipality code            | ISTAT Codes                                                                                                                                                                                                                                                                                                                                                                                                   |
| <b>sesto</b>      | gender                                 | "1" = Male; "2" = Female; "X" = Invalid data                                                                                                                                                                                                                                                                                                                                                                  |
| <b>cittad</b>     | cityzenship                            | "100" = italian citizenship; other citizenship by ISTAT codes                                                                                                                                                                                                                                                                                                                                                 |
| <b>età</b>        | age                                    | years                                                                                                                                                                                                                                                                                                                                                                                                         |
| <b>reg_res</b>    | residence regional code                | "010" = Piemonte; "020" = Val d'Aosta; "030" = Lombardia; "041" = P.A. di Bolzano; "042" = P.A. di Trento; "050" = Veneto; "060" = Friuli Venezia Giulia; "070" = Liguria; "080" = Emilia Romagna; "090" = Toscana; "100" = Umbria; "110" = Marche; "120" = Lazio; "130" = Abruzzo; "140" = Molise; "150" = Campania; "160" = Puglia; "170" = Basilicata; "180" = Calabria; "190" = Sicilia; "200" = Sardegna |
| <b>usl_res</b>    | regional hospital code                 |                                                                                                                                                                                                                                                                                                                                                                                                               |
| <b>tip_att</b>    | Activity Type                          | "A" = Acute; "N" = Nursery; "L" = Long-term care; "R" = Rehabilitation; "X" = errato                                                                                                                                                                                                                                                                                                                          |
| <b>reg_ric</b>    | Hospitalization Type                   | "1" = Ordinary Hospitalization; "2" = Day Hospital; "X" = errato                                                                                                                                                                                                                                                                                                                                              |
| <b>data_ric</b>   | hospitalization date                   | yyyymmdd                                                                                                                                                                                                                                                                                                                                                                                                      |
| <b>gg_deg</b>     | hospital stay/ day hospital admissions | Length of stay in ordinary regime if reg_ric = "1"; Number of accesses in Day Hospital if reg_ric = "2"                                                                                                                                                                                                                                                                                                       |
| <b>Tipo_drg24</b> | DRG type                               | "C" = Surgical DRG ; "M" = Medical DRG ; " " = not classified DRG                                                                                                                                                                                                                                                                                                                                             |
| <b>codice</b>     | identification code                    | Anonymous code for tracking repeated admissions; Use only class codes "A", "B", "C";                                                                                                                                                                                                                                                                                                                          |
| <b>dpr</b>        | Primary Diagnosis                      | ICD9CM diagnosis code                                                                                                                                                                                                                                                                                                                                                                                         |
| <b>dsec1</b>      | Secondary diagnosis 1                  | ICD9CM diagnosis code                                                                                                                                                                                                                                                                                                                                                                                         |
| <b>dsec2</b>      | Secondary diagnosis 2                  | ICD9CM diagnosis code                                                                                                                                                                                                                                                                                                                                                                                         |
| <b>dsec3</b>      | Secondary diagnosis 3                  | ICD9CM diagnosis code                                                                                                                                                                                                                                                                                                                                                                                         |
| <b>dsec4</b>      | Secondary diagnosis 4                  | ICD9CM diagnosis code                                                                                                                                                                                                                                                                                                                                                                                         |
| <b>dsec5</b>      | Secondary diagnosis 5                  | ICD9CM diagnosis code                                                                                                                                                                                                                                                                                                                                                                                         |
